# Supplementary material for: Clinical relevance and implementation into daily practice of pharmacist-prescribed medication for the management of minor ailments
Source: Front Pharmacol. 2024 Jan 24;14:1256172. doi: 10.3389/fphar.2023.1256172 (PMC10851422; doi:10.3389/fphar.2023.1256172)
Supplement: Supplementary file 2 [file Table1.XLSX]

## Sheet: PP list
Minor ailment/s	Indication (PP list)	INN	Off market	PP list medication	Identical OTC	Identical OTC medication	Similar OTC	Similar OTC medication	Clinical relevance	Terapeutic class	Homogeneus terapeutic class	Homogeneus terapeutic class medication	First-line treatment	Reclassified from OTC to prescription medication	Comments
Seasonal allergic rhinitis & Dermatoses	Seasonal allergic rhinitis & Urticaria	Bilastine	No	Tab 20 mg Tab orodisp. 10 mg Sol 2.5 mg/ml BILAXTEN	No	NA	No	NA	Positive	Antihistamine	Yes	Cetiriyine Tab 10mg N10 ZYRTEC and generics Levocetiriyine Tab Tab 5mg N10 ALLERGO-X	NA	No	Cetirizine and loratadine are the drugs of choice in the non-sedating anti-H1 class. Cetirizine and loratadine are the treatments for patients who are very bothered by pruritus in urticaria
Seasonal allergic rhinitis & Dermatoses	Seasonal allergic rhinitis & Urticaria	Cetirizine dihydrochloride	No	Tab 10 mg N30 Drops 10 mg/ml ZYRTEC and generics	Yes	Tab 10mg N10 ZYRTEC and generics	NA	NA	NA	Antihistamine	NA	NA	NA	No	Cetirizine and loratadine are the drugs of choice in the non-sedating anti-H1 class. Cetirizine and loratadine are the treatments for patients who are very bothered by pruritus in urticaria
Seasonal allergic rhinitis & Dermatoses	Seasonal allergic rhinitis & Urticaria	Desloratadine	No	Tab 5mg Sol 0,5 mg/ml AERIUS and generics	No	NA	No	NA	Positive	Antihistamine	Yes	Cetiriyine Tab 10mg N10 ZYRTEC and generics Levocetiriyine Tab Tab 5mg N10 ALLERGO-X	NA	No	Cetirizine and loratadine are the drugs of choice in the non-sedating anti-H1 class. Cetirizine and loratadine are the treatments for patients who are very bothered by pruritus in urticaria
Seasonal allergic rhinitis & Dermatoses	Seasonal allergic rhinitis & Urticaria	Levocetirizine dihydrochloride	No	Tab 5mg N30 Drops 5mg/ml XYZAL and generics	Yes	Tab 5mg N10 ALLERGO-X	NA	NA	NA	Antihistamine	NA	NA	NA	No	Cetirizine and loratadine are the drugs of choice in the non-sedating anti-H1 class. Cetirizine and loratadine are the treatments for patients who are very bothered by pruritus in urticaria
Seasonal allergic rhinitis & Dermatoses	Seasonal allergic rhinitis & Urticaria	Loratadine	Yes	NA	NA	NA	NA	NA	NA	Antihistamine	NA	NA	NA	No	NA
Seasonal allergic rhinitis & Dermatoses	Seasonal allergic rhinitis & Urticaria	Ketotifen	No	Tab 1mg ZADITEN	No	NA	No	NA	Positive	Antihistamine	Yes	Cetiriyine Tab 10mg N10 ZYRTEC and generics Levocetiriyine Tab Tab 5mg N10 ALLERGO-X	NA	No	Cetirizine and loratadine are the drugs of choice in the non-sedating anti-H1 class. Cetirizine and loratadine are the treatments for patients who are very bothered by pruritus in urticaria
Seasonal allergic rhinitis & Dermatoses	Seasonal allergic rhinitis & Urticaria	Fexofenadine hydrochloride	No	Tab 120 mg N30 TELFAST and generics	Yes	Tab 120mg N10 TELFAST and generics	NA	NA	NA	Antihistamine	NA	NA	NA	No	Cetirizine and loratadine are the drugs of choice in the non-sedating anti-H1 class. Cetirizine and loratadine are the treatments for patients who are very bothered by pruritus in urticaria
Seasonal allergic rhinitis	Seasonal allergic rhinitis	Azelastine hydrochloride nasal	No	0.14 µg/ puff Spray 10ml ALLERGODIL	Yes	0.14 µg/puff 5ml spray ALLERGODIL	NA	NA	NA	Antihistamine	NA	NA	NA	No	First-line treatment: Na cromoglicate nasal spray (not available in Switzerland), 2nd choice: azelastine nasal spray due to similar efficacy but more adverse effects. Beclometasone (OTC) nasal spray should be limited to the minimum necessary because of adverse effects. No other corticosteroids have advantage demonstrated.
Seasonal allergic rhinitis	Seasonal allergic rhinitis	Fluticasone furoate nasal	No	Spray 27.5 µg/puff AVAMYS	No	NA	No	NA	Positive	Corticoid	Yes	Beclometasone Spray 50 µg/puff OTRI hay fever	NA	No	First-line treatment: Na cromoglicate nasal spray (not available in Switzerland), 2nd choice: azelastine nasal spray due to similar efficacy but more adverse effects. Beclometasone (OTC) nasal spray should be limited to the minimum necessary because of adverse effects. No other corticosteroids have advantage demonstrated.
Seasonal allergic rhinitis	Seasonal allergic rhinitis	Mometasone furoate nasal	No	Spray 50 µg/puff NASONEX and generics	No	NA	No	NA	Positive	Corticoid	Yes	Beclometasone Spray 50 µg/puff OTRI cold of hay	NA	Yes	Beclometasone nasal spray should be limited to the minimum necessary because of adverse effects. No other corticosteroid has been advantage demonstrated on the beclomethasone.
Seasonal allergic rhinitis	Seasonal allergic rhinitis	Triamcinolone acetonide nasal	No	Spray 55 µg/puff NASACORT	No	NA	No	NA	Positive	Corticoid	Yes	Beclometon Spray 50 µg/puff OTRI hay fever	NA	Yes	Beclometasone nasal spray should be limited to the minimum necessary because of adverse effects. No other corticosteroid has been advantage demonstrated on the beclomethasone.
Eye disease	Seasonal allergic conjunctivitis	Azelastine hydrochloride ophthalmic	No	Ophthalmic drops 0,5 mg/ml (Bottle 6ml) ALLERGODIL	Yes	Ophthalmic drops 0,5mg/ml (Bottle 4ml) ALLERGODIL	NA	NA	NA	Antihistamine	NA	NA	NA	No	First-line treatment: Na cromoglicate eye drops (OTC). An anti-H1 drug such as levocabastine eye drops (OTC) is an alternative to Na cromoglicate.
Eye disease	Seasonal allergic conjunctivitis	Epinastine hydrochloride ophthalmic	No	Ophthalmic 0,5 mg /ml RELESTAT	No	NA	No	NA	Positive	Antihistamine	Yes	Levocabastine drops ophthalmic 0.5 mg/ml LIVOSTIN	NA	No	First-line treatment: Na cromoglicate eye drops (OTC). An anti-H1 drug such as levocabastine eye drops (OTC) is an alternative to Na cromoglicate.
Eye disease	Seasonal allergic conjunctivitis	Ketotifen ophtalmic	No	Ophthalmic 0.25 mg/ml ZADITEN	No	NA	No	NA	Positive	Antihistamine	Yes	Levocabastine drops ophthalmic 0.5 mg/ml LIVOSTIN	NA	No	First-line treatment: Na cromoglicate eye drops (OTC). An anti-H1 drug such as levocabastine eye drops (OTC) is an alternative to Na cromoglicate.
Eye disease	Seasonal allergic conjunctivitis	Olapatadine ophtalmic	No	Ophthalmic 1 mg/ml OPATANOL	No	NA	No	NA	Positive	Antihistamine	Yes	Levocabastine drops ophthalmic 0.5 mg/ml LIVOSTIN	NA	No	First-line treatment: Na cromoglicate eye drops (OTC). An anti-H1 drug such as levocabastine eye drops (OTC) is an alternative to Na cromoglicate.
Eye disease	Bacterial conjunctivitis	Diisétionate hexamidine ophthalmic	No	Drops opht. 1mg/ml DESOMEDINE	No	NA	No	NA	Positive	Antiseptic and disinfectant	No	NA	Yes	Yes	According to certain criteria, an antibiotic is deemed necessary, and in this case, there is no data to show a difference in efficacy between antibiotics. The treatment of bacterial conjunctivitis should primarily include an eye wash with saline solution combined with an antiseptic, antibiotic treatments are reserved for severe forms.
Eye disease	Dry eye	Hyaluronic acid ophthalmic	No	Gel opht 0.092mg/0.65ml LACRYCON and generics	No	NA	Yes	Ophthalmic gel 3 mg/ml VISMED	NA	Cicatrizant	NA	NA	NA	No	There are no standardized guidelines for the treatment of dry eye. Treatment determined individually for each patient on the basis of empirical values and adapted according to evolution
Acute disease respiratory system	Bronchospasms	Salbutamol inhaler	No	100 µg/puff VENTOLIN metered dose inhaler and generics	No	NA	No	NA	Positive	Adrenergic for systemic use	No	NA	Yes	No	First-line treatment for acute bronchospasm without inflammation, e.g. exercise-induced bronchoconstriction. Adults and adolescents ≥ 12 years: first-line treatment also for asthma (background and rescue treatment, inhaled corticosteroids or ICS – formoterol). 2nd choice (a SABA in emergency, always associated with a ICS). Children aged 6-11 years: 1st choice, SABA as rescue therapy, always combi…
Acute disease respiratory system	Bronchospasms	Terbutaline sulphate inhaler	No	Powder inh. 500 µg/puff BRICANYL	No	NA	No	NA	Positive	Adrenergic for systemic use	No	NA	Yes	No	First-line treatment for acute bronchospasm without inflammation, e.g. exercise-induced bronchoconstriction. Adults and adolescents ≥ 12 years: first-line treatment also for asthma (background and rescue treatment, inhaled corticosteroids or ICS – formoterol). 2nd choice (a SABA in emergency, always associated with a ICS). Children aged 6-11 years: 1st choice, SABA as rescue therapy, always combi…
Acute disease respiratory system	Rhinitis	Pseudoephedrine hydrochloride	No	Delayed capsules 120 mg RINORAL	No	NA	Yes	Only combination, non-delayed, 30 or 40 mg NEOCITRAN RHUME	NA	Nasal decongestant for systemic use	NA	NA	NA	Yes	Oral (or nasal) vasoconstrictors have a negative benefit/risk ratio.
Acute disease respiratory system	Cough	Codeine phosphate hemihydrate/Hydrochloride diphenhydramine	No	Syrup 5.7 mg /5ml + 14 mg /5ml BENYLIN	No	NA	No	NA	Positive	Cough suppressant	No	NA	No	Yes	Suppressing a cough is not desirable because it is a physiological reflex to evacuate mucus. When the cough is too frequent, painful, etc. the first-line treatment are opioid cough suppressants such as dextromethorphan, but with little effectiveness. Dextromethorphan should be used with caution: adverse effects of opioids and misuse. No clear evidence for or against the effectiveness of cough sup…
Acute disease respiratory system	Cough	Codeine phosphate/Guaifenesin hemihydrate	No	Drops 10 mg/ml + 100 mg/ml RESYL plus	No	NA	No	NA	Positive	Cough suppressants and expectorants	No	NA	No	Yes	Suppressing a cough is not desirable because it is a physiological reflex to evacuate mucus. When the cough is too frequent, painful, etc. the first-line treatment are opioid cough suppressants such as dextromethorphan, but with little effectiveness. Dextromethorphan should be used with caution: adverse effects of opioids and misuse. No clear evidence for or against the effectiveness of cough sup…
Acute disease respiratory system	Cough	Codeine phosphate/Methylephedrine hydrochloride or Diphenhydramine hydrochloride/Noscapine	No	Caps. Day 20 mg + 30 mg + 30 mg Caps. Night 20 mg + 50 mg + 30 mg TOSSAMINE PLUS	No	NA	No	NA	Positive	Opioid, combination excl. psychodeptics	No	NA	No	Yes	Suppressing a cough is not desirable because it is a physiological reflex to evacuate mucus. When the cough is too frequent, painful, etc. the first-line treatment are opioid cough suppressants such as dextromethorphan, but with little effectiveness. Dextromethorphan should be used with caution: adverse effects of opioids and misuse. No clear evidence for or against the effectiveness of cough sup…
Acute disease respiratory system	Cough	Dextrometorphan	No	Syrup 12,5 mg /5ml BEXINE and generics	No	NA	No	NA	Positive	Cough suppressant	No	NA	No	Yes	Suppressing a cough is not desirable because it is a physiological reflex to evacuate mucus. When the cough is too frequent, painful, etc. the first-line treatment are opioid cough suppressants such as dextromethorphan, but with little effectiveness. Dextromethorphan should be used with caution: adverse effects of opioids and misuse. No clear evidence for or against the effectiveness of cough sup…
Acute disease respiratory system	Cough	Thiocyanate dihydrocodeine	No	Drops 10mg/ml PARACODIN	No	NA	No	NA	Positive	Cough suppressant	No	NA	No	Yes	Suppressing a cough is not desirable because it is a physiological reflex to evacuate mucus. When the cough is too frequent, painful, etc. the first-line treatment are opioid cough suppressants such as dextromethorphan, but with little effectiveness. Dextromethorphan should be used with caution: adverse effects of opioids and misuse. No clear evidence for or against the effectiveness of cough sup…
Acute disease respiratory system	Cough	Thiocyanate dihydrocodeine/Belladonna/Drosera/Guaifenesin	No	Drops 10mg/ml + 10mg/ml + 10mg/ml + 92.5 mg/ml ESCOTUSSIN	No	NA	No	NA	Positive	Cough suppressants and expectorants	No	NA	No	Yes	Suppressing a cough is not desirable because it is a physiological reflex to evacuate mucus. When the cough is too frequent, painful, etc. the first-line treatment are opioid cough suppressants such as dextromethorphan, but with little effectiveness. Dextromethorphan should be used with caution: adverse effects of opioids and misuse. No clear evidence for or against the effectiveness of cough sup…
Acute disease respiratory system	Cough	Oxomemazine	No	Sir 1.65mg/5ml TOPLEXIL	No	NA	No	NA	Negative	Antihistamine	NA	NA	NA	Yes	Suppressing a cough is not desirable because it is a physiological reflex to evacuate mucus. When the cough is too frequent, painful, etc. the first-line treatment are opioid cough suppressants such as dextromethorphan, but with little effectiveness. Dextromethorphan should be used with caution: adverse effects of opioids and misuse. No clear evidence for or against the effectiveness of cough sup…
Acute disease respiratory system	Cough	Pholcodine	No	Sir 6mg/10ml + 7.3mg/10ml PHOL-TUSSIN	No	NA	No	NA	Negative	Cough suppressant	NA	NA	NA	Yes	Suppressing a cough is not desirable because it is a physiological reflex to evacuate mucus. When the cough is too frequent, painful, etc. the first-line treatment are opioid cough suppressants such as dextromethorphan, but with little effectiveness. Dextromethorphan should be used with caution: adverse effects of opioids and misuse. No clear evidence for or against the effectiveness of cough sup…
Acute disease respiratory system	Other	Cineol/Potassium sulphate oxyquinoline/Terpene Hydrate	No	Supp 80 mg + 5 mg + 15 mg RECTOSEPTAL - NEO simple	No	NA	Yes	Supp 120 mg + 2mg + 170 mg RECTOSEPTAL- NEO BISMUTH	NA	Expectorant, excl. Combination with cough suppressants	NA	NA	NA	Yes	If adjuvant against cold necessary (fever, pain): paracetamol it is the first-line treatment. Terpene derivatives as ointment, inhalation or suppositories: very uncertain efficacy for common cold. These derivatives have no clearly demonstrated efficacy against cough, as there are no clinical trials. Adverse reactions: in young children, convulsions, suppository form, local lesions; elderly: agita…
Disease digestive system	Nausea/vomiting	Domperidone	No	Susp. 1mg/ml MOTILIUM Tab orodisp. 10mg MOTILIUM and generics	No	NA	No	NA	Negative	Drugs for functional gastrointestinal disorders	NA	NA	NA	No	Adverse effects: risk QT interval prolongation and risk of sudden death. Unfavorable benefit- risk balance.
Disease digestive system	Gastro-esophageal reflux	Dexlansoprazole	No	Delayed caps 30mg DEXILANT	No	NA	No	NA	Positive	IPP	Yes	Caps 20 mg N7 OMED Tab 20mg N7 PANTOZOL Control	NA	No	First-line treatment among PPIs: omeprazole, as it has the longest history of use and is the most documented. No demonstrated difference in efficacy for other PPIs compared to omeprazole or between them.
Disease digestive system	Gastro-esophageal reflux	Esomeprazole	No	Suspension 10 mg Caps Tab 20 mg NEXIUM and generics	No	NA	No	NA	Positive	IPP	Yes	Caps 20 mg N7 OMED Tab 20mg N7 PANTOZOL Control	NA	No	First-line treatment among PPIs: omeprazole, as it has the longest history of use and is the most documented. No demonstrated difference in efficacy for other PPIs compared to omeprazole or between them.
Disease digestive system	Gastro-esophageal reflux	Lansoprazole	No	Caps 15mg AGOPTON and generics	No	NA	No	NA	Positive	IPP	Yes	Caps 20 mg N7 OMED Tab 20mg N7 PANTOZOL Control	NA	No	First-line treatment PPIs: omeprazole, as it has the longest history of use and is the most documented. No demonstrated difference in efficacy for other PPIs compared to omeprazole or between them.
Disease digestive system	Gastro-esophageal reflux	Omeprazole	No	Caps/Tabs 10 mg/20 mg ANTRAMUPS and generics	Yes	Caps 20 mg N7 OMED	NA	NA	NA	IPP	NA	NA	NA	No	First-line treatment among PPIs: omeprazole, as it has the longest history of use and is the most documented. No demonstrated difference in efficacy for other PPIs compared to omeprazole or between them.
Disease digestive system	Gastro-esophageal reflux	Pantoprazole	No	Tab 20mg PANTOZOL and generics	Yes	Tab 20mg N7 PANTOZOL Control	NA	NA	NA	IPP	NA	NA	NA	No	First-line treatment among PPIs: omeprazole, as it has the longest history of use and is the most documented. No demonstrated difference in efficacy for other PPIs compared to omeprazole or between them.
Disease digestive system	Gastro-esophageal reflux	Sodium rabeprazole	No	Tab 10mg PARIET and generics	No	NA	No	NA	Positive	IPP	Yes	Caps 20 mg N7 OMED Tab 20mg N7 PANTOZOL Control	NA	No	First-line treatment among PPIs: omeprazole, as it has the longest history of use and is the most documented. No demonstrated difference in efficacy for other PPIs compared to omeprazole or between them.
Disease digestive system	Functional disorder of the GI tract	Mebeverine hydrochloride	No	200mg delayed tabs DUSPATALIN	No	NA	No	NA	Positive	Drugs for functional gastrointestinal disorders	No	NA	Yes	No	First-line treatment for recurrent benign intestinal disorders: pinaverium. Benefit-risk balance of mebeverine is not as good as pinaverium because of the side effects: slowing of the heart rate and severe allergic reactions (angioedema). Comparison of efficacy of spasmolytics used in Switzerland (mebeverine, pinaverium, butylscopolamine, etc.) difficult to determine due to differences in quality…
Disease digestive system	Diarrhea	Loperamide hydrochloride	No	Syrup 0.2 mg/ml IMODIUM	No	NA	Yes	Caps Tabs Tabs orodisp. 2 mg IMODIUM and generics	NA	Antidiarrheal, intestinal, antiinflammatory/antiifective agent	NA	NA	NA	No	First-line treatment: oral rehydration solution (in case of moderate dehydration). No anti-diarrheal drug prevents or corrects dehydration. Negative benefit-risk balance: risk of intestinal paralysis and drowsiness hampering rehydration. Imodium syrup is suitable for children from 2 to 5 years while the PP list remarks contraindicate it for children < 6 years.
Disease digestive system	Constipation	Macrogol 3350/Sodium bicarbonate/Sodium chloride/Potassium chloride	No	Powder/Sol 13,125 g +178,6 mg +350.8 mg +50.2mg MOVICOL Powder 13.125 g + 178.6 mg + 350.8 mg +46.6mg MOVICOL and generics Powder 6,563 g + 89.3 mg + 175.4 mg + 23.3 mg MACROGOL MEPHA Junior Powder 6,563 g + 89.3 mg + 175.4 mg + 25.1 mg MOVICOL Junior	No	NA	No	NA	Positive	Osmotically acting laxative	Yes	Powder Macrogol 4000 (10.00 g) LAXIPEG Powder Macrogol 4000 (9.736 g) LAXIPEG Powder Macrogol 4000 (10.00g) LAXIPEG Powder Macrogol 4000 (10.00g) LAXIPEG	NA	No	First-line treatments: Adults: ballast laxatives to be taken with sufficient fluid to avoid risks of obstruction of the intestine or rectum. An osmotic laxative is an alternative: macrogols are more effective than lactulose. Children: in case of persistent constipation, an osmotic laxative (lactulose or macrogol) taken for several days to restore the stool rhythm. Stimulant laxatives such as sodi…
Disease digestive system	Constipation	Sodium picosulfate	No	Drops 7.5 mg/ml 30 ml bottle LAXOBERON	Yes	Drops 7.5mg/ml 15 ml bottle DULCOLAX	NA	NA	NA	Contact laxative	NA	NA	NA	No	First-line treatments: Adults: ballast laxatives to be taken with sufficient fluid to avoid risks of obstruction of the intestine or rectum. An osmotic laxative is an alternative: macrogols are more effective than lactulose. Children: in case of persistent constipation, an osmotic laxative (lactulose or macrogol) taken for several days to restore the stool rhythm. Stimulant laxatives such as sodi…
Disease digestive system	Constipation	Phenolphthalein/Agar/Paraffin	No	Emulsion 65 mg/5ml + 15 mg/5ml + 2 g/5ml PARAGAR	No	NA	Yes	Paraffin emulsion liq. (1.9 g) PARAGOL N	NA	Softener, emolient	NA	NA	NA	No	First-line treatments: Adults: ballast laxatives to be taken with sufficient fluid to avoid risks of obstruction of the intestine or rectum. An osmotic laxative is an alternative: macrogols are more effective than lactulose. Children: in case of persistent constipation, an osmotic laxative (lactulose or macrogol) taken for several days to restore the stool rhythm. Stimulant laxatives such as sodi…
Disease digestive system	Hemorrhoidal crisis	Calcium dobesilate/Lidocaine hydrochloride/Dexamethasone	No	Ung. 40 mg/g + 20 mg/g + 0.25 mg/g DOXIPROCT Plus	No	NA	No	NA	Positive	Vasoprotective	Yes	Ung. 40mg/g 20 mg/g DOXIPROCT	NA	No	First-line treatment: local application of a lubricant such as petroleum jelly or a water-based gel. If analgesic is required, paracetamol or, alternatively, ibuprofen. The application of local drugs such as local anesthetic (available on OTC) or corticosteroid are not proven to be more effective than a lubricant.
Disease digestive system	Hemorrhoidal crisis	Policresulen/Cinchocaine hydrochloride	No	Supp. 100 mg + 2.5 mg FAKTU Ung. 50 mg/g + 10 mg/g FAKTU	No	NA	No	NA	Positive	Agent for treatment of hemorrhoids and anal fissures for topical use	No	NA	No	No	First-line treatment: local application of a lubricant such as petroleum jelly or a water-based gel. If analgesic is required, paracetamol or, alternatively, ibuprofen. The application of local drugs such as local anesthetic (available on OTC) or corticosteroid are not proven to be more effective than a lubricant.
Disease digestive system	Obesity	Orlistat	No	Caps 120 mg XENICAL	No	NA	Yes	Caps 60 mg CALOBALIN	NA	Antiobesity preparation, excl. diet products	NA	NA	NA	No	No drug is safe for long-term weight loss. Orlistat: modest and temporary effectiveness. Undesirable effects: very frequent digestive disorders, liver damage, hyperoxaluria. Numerous interactions by changes in digestive absorption (fat-soluble vitamins, hormones, etc.) thyroid, etc.).
Dermatoses	Bacterial skin infection	Silver sulfadiazine/Sodium hyaluronate local	No	Cream 10 mg/g + 2 mg/g IALUGEN Plus	No	NA	Yes	Gauze med. 10 mg/g + 0.5 mg/g IALUGEN Plus	NA	Chemotherapeutic for topical use	NA	NA	NA	No	Few guidelines, and no place for sulfadiazine in the recommendations. As 1st line of treatment: an oral antibiotic (max. 7 days) in France and Switzerland; topical antibiotic (5-10 days) if localized infection: fusidic acid or mupirocin.
Dermatoses	Viral skin infection: herpes	Aciclovir local	No	Cream 50 mg/g Tube 5g and 10g ZOVIRAX and generics	Yes	Cream 50 mg/g Tube 2g ZOVIRAX LIP	NA	NA	NA	Antiviral	NA	NA	NA	No	Herpes labialis: First-line treatment aciclovir 5% cream. Effectiveness at best modest Genital herpes: treatment with topical aciclovir alone not recommended. Benefit/risk balance unfavorable.
Dermatoses	Viral skin infection: warts	Monochloroacetic acid local	No	Sol. 500 mg/g ACETOCAUSTIN	No	NA	No	NA	Positive	Keratolytic	No	NA	No	No	If warts do not cause pain or complications: do not treat. Treatment of choice if necessary: cryotherapy. Unfavorable benefit/risk balance: acid-based verrucids are not very effective but very corrosive. Risk of 2nd degree burns with permanent sequelae. Retinoids are used for flat warts but lack evidence efficiency.
Dermatoses	Viral skin infection: warts	Dexpanthenol/Tretinoin/Urea local	No	Cream 0.3 mg/g + 120 mg/g + 10 mg/g CARBAMIDE VAS Widmer	No	NA	No	NA	Positive	Preparation for treatment of wounds and ulcers	No	NA	No	No	If warts do not cause pain or complications: do not treat. Treatment of choice if necessary: cryotherapy. Unfavorable benefit/risk balance: acid-based verrucids are not very effective but very corrosive. Risk of 2nd degree burns with permanent sequelae. Retinoids are used for flat warts but lack evidence efficiency.
Dermatoses	Parasitosis: scabies	Permethrin local	No	Cream 50 mg/g SCABI-MED	No	NA	No	NA	Positive	Ectorapasiticides, incl. scabicides, insecticides and repellents	No	NA	Yes	No	First-line treatment: local permethrin 5% or systemic ivermectin.
Dermatoses	Acne	Adapalene local	No	Cream Gel 1 mg/g DIFFERIN	No	NA	No	NA	Positive	Antiacne preparation for topical use	No	NA	Yes	No	For moderate acne, First-line treatment - benzoyl peroxide + retinoids or local antibiotics.
Dermatoses	Acne	Isotretinoin local	No	Gel 0.5 mg/g ROACCUTAN	No	NA	No	NA	Positive	Antiacne preparation for topical use	No	NA	Yes	No	For moderate acne, First-line treatment- benzoyl peroxide + retinoids or local antibiotics.
Dermatoses	Acne	Tretinoin local	No	Cream Lotion 0.5 mg/g AIROL	No	NA	No	NA	Positive	Antiacne preparation for topical use	No	NA	Yes	No	For moderate acne, First-line treatment - benzoyl peroxide + retinoids or local antibiotics.
Dermatoses	Acne rosacea	Ivermectin local	No	Cream 10 mg/g SOOLANTRA	No	NA	No	NA	Positive	Other dermatological preparation	No	NA	Yes	No	Mild to moderate rosacea, First-line treatment: local metronidazole. Ivermectin is an option that does not have a more favorable benefit/risk balance.
Dermatoses	Local anesthesia	Lidocaine/Prilocaine local	No	Cream 25 mg/g Patch 25 mg/patch EMLA	No	NA	No	NA	Positive	Anesthetic local	No	NA	Yes	No	No international recommendations. Note: difficult identification since it precedes an act medical.
Dermatoses	Skin mycoses	Ciclopiroxolamine local	No	Cream 10 mg/g Sol. 10 mg/ml MYCOSTER CICLOCUTAN Shampoo 15 mg/g SEBIPROX	No	NA	No	NA	Positive	Antifungal for dermatological use	Yes	Econazole 10 mg/g Cream Vapo powder. PEVARYL	NA	No	Foot fungus: First-line treatment ciclopiroxolamine and econazole. Treatment with allylamine (terbinafine) in 1st choice because more effective than azoles. Nystatin not effective in case of dermatophytes. Intertrigo over large folds: 1st drug choice, econazole applied locally (1% cream). Pytiriasis versicolor: ketoconazole 2% shampoo because it is the most practical and easy to use form. From 12…
Dermatoses	Skin mycoses	Isoconazole nitrate local	No	Cream 10 mg/g TRAVOGEN	No	NA	No	NA	Positive	Antifungal for dermatological use	Yes	Econazole 10 mg/g Cream Vapo powder. PEVARYL	NA	No	Foot fungus: 1st choice ciclopiroxolamine and econazole. Treatment with allylamine (terbinafine) in 1st choice because more effective than azoles. Nystatin not effective in case of dermatophytes. Intertrigo over large folds: 1st drug choice, econazole applied locally (1% cream). Pytiriasis versicolor: ketoconazole 2% shampoo because it is the most practical and easy to use form. From 12 years of …
Dermatoses	Skin mycoses	Miconazole nitrate local	No	Shampoo 20 mg/g SEBOLOX (scalp)	No	NA	Yes	Shampoo 10 mg/g TERZOLIN (hair)	NA	Antifungal for dermatological use	NA	NA	NA	No	Foot fungus: 1st choice ciclopiroxolamine and econazole. Treatment with allylamine (terbinafine) in 1st choice because more effective than azoles. Nystatin not effective in case of dermatophytes. Intertrigo over large folds: 1st drug choice, econazole applied locally (1% cream). Pytiriasis versicolor: ketoconazole 2% shampoo because it is the most practical and easy to use form. From 12 years of …
Dermatoses	Skin mycoses	Ketoconazole local	No	Shampoo Cream 20 mg/g NIZORAL and generics (corp and hair)	No	NA	Yes	Shampoo 10 mg/g TERZOLIN (hair)	NA	Antifungal for dermatological use	NA	NA	NA	No	Foot fungus: 1st choice ciclopiroxolamine and econazole. Treatment with allylamine (terbinafine) in 1st choice because more effective than azoles. Nystatin not effective in case of dermatophytes. Intertrigo over large folds: 1st drug choice, econazole applied locally (1% cream). Pytiriasis versicolor: ketoconazole 2% shampoo because it is the most practical and easy to use form. From 12 years of …
Dermatoses	Skin mycoses	Nystatin/Yznc oxide local	No	100,000 pulp I.U/g + 200mg/g MULTILIND	No	NA	Yes	Shampoo 10 mg/g TERZOLIN (hair)	NA	Antifungal for dermatological use	NA	NA	NA	No	Foot fungus: 1st choice ciclopiroxolamine and econazole. Treatment with allylamine (terbinafine) in 1st choice because more effective than azoles. Nystatin not effective in case of dermatophytes. Intertrigo over large folds: 1st drug choice, econazole applied locally (1% cream). Pytiriasis versicolor: ketoconazole 2% shampoo because it is the most practical and easy to use form. From 12 years of …
Dermatoses	Nail fungus	Amorolfine	No	Varnish 50 mg/ml Bottle 5ml LOCERYL and generics	Yes	Varnish 50 mg/ml Bottle 2,5ml CURANEL	NA	NA	NA	Antifungal for dermatological use	NA	NA	NA	No	Film-forming solutions containing amorolfine or ciclopirox to be preferred against onychomycosis.
Dermatoses	Nail fungus	Ciclopirox local	No	Varnish 80 mg/g CICLOPOLI	No	NA	No	NA	Positive	Antifungal for dermatological use	Yes	Varnish 50 mg/ml Bottle 2,5ml CURANEL	NA	No	Film-forming solutions containing amorolfine or ciclopirox to be preferred against onychomycosis.
Dermatoses	Mycoses and skin infections	Clotrimazole/Diisethionate of hexamidine local	No	Cream 10 mg/g + 2.5 mg/g IMAZOL	No	NA	No	NA	Positive	Antifungal for dermatological use	No	NA	No	No	No international or national recommendations. Dermo corticoids are not recommended in combination with an antifungal agent. Negative benefit/risk balance in inflammatory skin mycoses: increased risk of exacerbation of infection. Note: difficult diagnostic
Dermatoses	Mycoses and skin infections	Clotrimazole/Diisethionate of hexamidine/Prednisolone acetate local	No	Cream 10 mg/g + 2.5 mg/g + 5 mg/g IMACORT	No	NA	No	NA	Negative	Antifungal for dermatological use	NA	NA	NA	No	No international or national recommendations. Dermo corticoids are not recommended in combination with an antifungal agent. Negative benefit/risk balance in inflammatory skin mycoses: increased risk of exacerbation of infection. Note: difficult diagnostic
Dermatoses	Dermatitis and eczema non infected	Clobetasone 17- butyrate local	No	Cream 0.5 mg/g EMOVATE	No	NA	No	NA	Positive	Corticoid	No	NA	Yes	No	1st drug choice: one corticosteroid without combination. Class II in practice: extensive mild dermatoses; moderate dermatoses (caution on face, folds and genital areas).
Dermatoses	Dermatitis and eczema non infected	Hydrocortisone 17-butyrate local	No	Cream Emulsion 1 mg/g LOCOID	No	NA	No	NA	Positive	Corticoid	No	NA	Yes	No	1st drug choice: one corticosteroid without combination. Class II in practice: extensive mild dermatoses; moderate dermatoses (caution on face, folds and genital areas).
Dermatoses	Dermatitis and eczema non infected	Salicylic acid/Triamcinolone acetonide local	No	Tincture 20 mg/g +2 mg/g KENACORT A	No	NA	No	NA	Positive	Corticoid	No	NA	Yes	Yes	1st drug choice: single corticosteroid. More specific dosage form for the scalp and nails.
Dermatoses	Dermatitis and eczema non infected	Prednisolone acetate	Yes	NA	NA	NA	NA	NA	NA	Corticoid	NA	NA	NA	No	NA
Dermatoses	Dermatitis and eczema non infected	Desonide	Yes	NA	NA	NA	NA	NA	NA	Corticoid	NA	NA	NA	No	NA
Dermatoses	Dermatitis and eczema non infected	Flumetasone 21-pivalate	Yes	NA	NA	NA	NA	NA	NA	Corticoid	NA	NA	NA	No	NA
Dermatoses	Androgenic alopecia	Finasteride	No	Tab 1mg PROPECIA	No	NA	No	NA	Negative	Other dermatological preparation	NA	NA	NA	No	No international recommendations. Minimal effectiveness in androgenic alopecia. Beware of serious side effects: suicidal ideation, depression, sexual dysfunction that may persist after stopping
Urogenital diseases	Vaginal mycoses	Ciclopiroxolamine vaginal	No	Ovules 100 mg Vag. cream 10mg/g DAFNEGIL	No	NA	No	NA	Positive	Antifungal for dermatological use	Yes	Clotrimazol Tab vag. 200mg Vag. cream 2% GYNO-CANESTEN	NA	No	1st drug choice: azole antifungals, efficacy comparable to clotrimazole, econazole and miconazole via vaginal (optimal duration: single dose or 3 days) - fluconazole and itraconazole via oral (single dose).
Urogenital diseases	Vaginal mycoses	Econazole nitrate vaginal	No	Ovules 50 mg and 150 mg Vag. cream 10mg/g GYNO-PEVARYL	No	NA	No	NA	Positive	Antifungal for dermatological use	Yes	Clotrimazol Tab vag. 200mg Vag. cream 2% GYNO-CANESTEN	NA	No	1st drug choice: azole antifungals, efficacy comparable to clotrimazole, econazole and miconazole via vaginal (optimal duration: single dose or 3 days) - fluconazole and itraconazole via oral (single dose).
Urogenital diseases	Vaginal mycoses	Povidone iodine	No	Ovules 200mg BETADINE	No	NA	No	NA	Negative	Antiseptic and disinfectant	NA	NA	NA	No	1st drug choice: azole antifungals, efficacy comparable to clotrimazole, econazole and miconazole via vaginal (optimal duration: single dose or 3 days) - fluconazole and itraconazole via oral (single dose) Povidone iodine has no place in the treatment plan for vaginitis.
Urogenital diseases	Restoration flora vaginal	Oestriol/Lactobacillus acidophillus vaginal	No	Tab. vag. 0.03 mg + 10mil. GYNOFLOR	No	NA	No	NA	Positive	Antiinfective and antiseptic, excl. combination with corticosteroids	Yes	Lactobacillus acidophilus Lactic acid Soya extract Tab. vag. 500 mil. + 15 mg +18 mg GYNESTRAL	NA	No	Adding probiotics to azole antifungals increases the short-term cure rate with no proven effect at one month.
Urogenital diseases	Erectile dysfunction	Sildenafil	No	Tabs orodisp. 25mg VIAGRA and generics	No	NA	No	NA	Positive	Urological	No	NA	Yes	No	1st drug choice: sildenafil.
Urogenital diseases	Prophylaxis UTI	Chlorhexidine acetate local	No	Irrigation sol. 0,02g /100ml URO-TAINER	No	NA	No	NA	Positive	Antiseptic and disinfectant	No	NA	No	Yes	Recommendations hcpi for nursing homes: no bladder irrigation (flushing).
Acute pain	Acute pain	Acetylsalicylic acid	No	Powder 1000mg ASPEGIC	No	NA	Yes	Powder 500mg ASPEGIC Tab 500mg ASPIRIN	NA	AINS	NA	NA	NA	No	1st drug choice of nociceptive pain: paracetamol. If too little or too short-lived, an NSAID: ibuprofen (max. 1200 mg/d) and naproxen (max. 1000 mg/d) are preferred. Due to the more serious adverse effects: diclofenac not recommended, metamizole not recommended. Ketoprofen is more prone to severe photosensitization than other topical NSAIDs, negative benefit-risk balance. For soft tissue injuries…
Acute pain	Acute pain	Diclofenac	No	Tabs Caps 25 mg or 50 mg Granules, Powder 50 mg Drops 15 mg/ml Supp. 12.5 mg, 25 mg or 50 mg VOLTARENE and generics	Yes	Caps 25mg N10 VOLTAREN DOLO forte	NA	NA	NA	AINS	NA	NA	NA	No	1st drug choice of nociceptive pain: paracetamol. If too little or too short-lived, an NSAID: ibuprofen (max. 1200 mg/d) and naproxen (max. 1000 mg/d) are preferred. Due to the more serious adverse effects: diclofenac not recommended, metamizole not recommended. Ketoprofen is more prone to severe photosensitization than other topical NSAIDs, negative benefit-risk balance. For soft tissue injuries…
Acute pain	Acute pain	Ibuprofen	No	Tab 200 mg, 400 mg or 600 mg Granules 400 mg or 600 mg Susp. 100 mg/5ml or 200 mg/5ml BRUFEN and generics	Yes	Tab 400 mg N10 Tab 200 mg N20 Susp. 100 mg/5ml ALGIFOR-L	NA	NA	NA	AINS	NA	NA	NA	No	1st drug choice of nociceptive pain: paracetamol. If too little or too short-lived, an NSAID: ibuprofen (max. 1200 mg/d) and naproxen (max. 1000 mg/d) are preferred. Due to the more serious adverse effects: diclofenac not recommended, metamizole not recommended. Ketoprofen is more prone to severe photosensitization than other topical NSAIDs, negative benefit-risk balance. For soft tissue injuries…
Acute pain	Acute pain	Ketoprofen local	No	Gel 25 mg/g FASTUM	No	NA	No	NA	Negative	AINS	NA	NA	NA	No	1st drug choice of nociceptive pain: paracetamol. If too little or too short-lived, an NSAID: ibuprofen (max. 1200 mg/d) and naproxen (max. 1000 mg/d) are preferred. Due to the more serious adverse effects: diclofenac not recommended, metamizole not recommended. Ketoprofen is more prone to severe photosensitization than other topical NSAIDs, negative benefit-risk balance. For soft tissue injuries…
Acute pain	Acute pain	Mefenamic acid	No	Caps 250mg Tab 500 mg Supp. 125 mg or 500mg PONSTAN and generics	No	NA	No	NA	Positive	AINS	Yes	Acetylsalicylic acid Powder 500mg ASPEGIC Tab 500mg ASPIRIN Diclofenac Caps 25mg N10 VOLTAREN DOLO forte Diclofenac Emulgel 10 mg/g VOLTARENE Ibuprofen Tab 400 mg N10 Tab 200 mg N20 Susp. 100 mg/5ml ALGIFOR-L Naproxen Tab 220mg ALEVE	NA	No	1st drug choice of nociceptive pain: paracetamol. If too little or too short-lived, an NSAID: ibuprofen (max. 1200 mg/d) and naproxen (max. 1000 mg/d) are preferred. Due to the more serious adverse effects: diclofenac not recommended, metamizole not recommended. Ketoprofen is more prone to severe photosensitization than other topical NSAIDs, negative benefit-risk balance. For soft tissue injuries…
Acute pain	Acute pain	Naproxen	No	Tab 250 mg or 500 mg PROXEN	No	NA	Yes	Tab 220mg ALEVE	NA	AINS	NA	NA	NA	No	1st drug choice of nociceptive pain: paracetamol. If too little or too short-lived, an NSAID: ibuprofen (max. 1200 mg/d) and naproxen (max. 1000 mg/d) are preferred. Due to the more serious adverse effects: diclofenac not recommended, metamizole not recommended. Ketoprofen is more prone to severe photosensitization than other topical NSAIDs, negative benefit-risk balance. For soft tissue injuries…
Acute pain	Acute pain	Sodium naproxen	No	Tab 550mg APRANAX	No	NA	Yes	Tab 220mg ALEVE	NA	AINS	NA	NA	NA	No	1st drug choice of nociceptive pain: paracetamol. If too little or too short-lived, an NSAID: ibuprofen (max. 1200 mg/d) and naproxen (max. 1000 mg/d) are preferred. Due to the more serious adverse effects: diclofenac not recommended, metamizole not recommended. Ketoprofen is more prone to severe photosensitization than other topical NSAIDs, negative benefit-risk balance. For soft tissue injuries…
Acute pain	Acute pain	Metamizole	No	Tab 500 mg Drops 500 mg/ml Supp. 1000 mg NOVALGIN and generics	No	NA	No	NA	Negative	AINS	NA	NA	NA	No	1st drug choice of nociceptive pain: paracetamol. If too little or too short-lived, an NSAID: ibuprofen (max. 1200 mg/d) and naproxen (max. 1000 mg/d) are preferred. Due to the more serious adverse effects: diclofenac not recommended, metamizole not recommended. Ketoprofen is more prone to severe photosensitization than other topical NSAIDs, negative benefit-risk balance. For soft tissue injuries…
Acute pain	Acute pain	Paracetamol	No	Tab Tab. eff. 1000 mg DAFALGAN and generics Supp. 1000 mg BEN-U-RON	No	NA	Yes	Tab Eff. Tab. Chewable 500mg Supp. 600mg DAFALGAN	NA	Analgesic	NA	NA	NA	No	1st drug choice of nociceptive pain: paracetamol. If too little or too short-lived, an NSAID: ibuprofen (max. 1200 mg/d) and naproxen (max. 1000 mg/d) are preferred. Due to the more serious adverse effects: diclofenac not recommended, metamizole not recommended. Ketoprofen is more prone to severe photosensitization than other topical NSAIDs, negative benefit-risk balance. For soft tissue injuries…
Migraine crisis	Migrane crisis	Almotriptan	No	Tab 12.5 mg ALMOGRAN	No	NA	No	NA	Positive	Antimigraine preparation	No	NA	No	No	Migraine attacks of low intensity and without daily handicap: NSAIDs or paracetamol may be sufficient. Migraine crisis moderate to severe and daily disability: treatment is mainly based on triptans. 1st drug choice of triptan: sumatriptan; naratriptan is an option to reduce risk of recurrence rather than speed of action. When a triptan or a dosage form has not been effective, it is timely change …
Migraine crisis	Migrane crisis	Eleriptan	No	Tab 40 mg RELPAX	No	NA	No	NA	Positive	Antimigraine preparation	No	NA	No	No	Migraine attacks of low intensity and without daily handicap: NSAIDs or paracetamol may be sufficient. Migraine crisis moderate to severe and daily disability: treatment is mainly based on triptans. 1st drug choice of triptan: sumatriptan; naratriptan is an option to reduce risk of recurrence rather than speed of action. When a triptan or a dosage form has not been effective, it is timely change …
Migraine crisis	Migrane crisis	Frovatriptan	No	Tab 2.5mg MENAMIG	No	NA	No	NA	Positive	Antimigraine preparation	No	NA	No	No	Migraine attacks of low intensity and without daily handicap: NSAIDs or paracetamol may be sufficient. Migraine crisis moderate to severe and daily disability: treatment is mainly based on triptans. 1st drug choice of triptan: sumatriptan; naratriptan is an option to reduce risk of recurrence rather than speed of action. When a triptan or a dosage form has not been effective, it is timely change …
Migraine crisis	Migrane crisis	Naratriptan	No	Tab 2.5 mg NARAMIG	No	NA	No	NA	Positive	Antimigraine preparation	No	NA	Yes	No	Migraine attacks of low intensity and without daily handicap: NSAIDs or paracetamol may be sufficient. Migraine crisis moderate to severe and daily disability: treatment is mainly based on triptans. 1st drug choice of triptan: sumatriptan; naratriptan is an option to reduce risk of recurrence rather than speed of action. When a triptan or a dosage form has not been effective, it is timely change …
Migraine crisis	Migrane crisis	Rizatriptan	No	Tab Tab orodisp. 5mg MAXALT	No	NA	No	NA	Positive	Antimigraine preparation	No	NA	No	No	Migraine attacks of low intensity and without daily handicap: NSAIDs or paracetamol may be sufficient. Migraine crisis moderate to severe and daily disability: treatment is mainly based on triptans. 1st drug choice of triptan: sumatriptan; naratriptan is an option to reduce risk of recurrence rather than speed of action. When a triptan or a dosage form has not been effective, it is timely change …
Migraine crisis	Migrane crisis	Sumatriptan	No	Tab 50mg Spray 10mg IMIGRAN	No	NA	No	NA	Positive	Antimigraine preparation	No	NA	Yes	No	Migraine attacks of low intensity and without daily handicap: NSAIDs or paracetamol may be sufficient. Migraine crisis moderate to severe and daily disability: treatment is mainly based on triptans. 1st drug choice of triptan: sumatriptan; naratriptan is an option to reduce risk of recurrence rather than speed of action. When a triptan or a dosage form has not been effective, it is timely change …
Migraine crisis	Migrane crisis	Zolmitriptan	No	Tab orodisp. 2.5mg Spray 2.5mg ZOMIG	No	NA	No	NA	Positive	Antimigraine preparation	No	NA	No	No	Migraine attacks of low intensity and without daily handicap: NSAIDs or paracetamol may be sufficient. Migraine crisis moderate to severe and daily disability: treatment is mainly based on triptans. 1st drug choice of triptan: sumatriptan; naratriptan is an option to reduce risk of recurrence rather than speed of action. When a triptan or a dosage form has not been effective, it is timely change …
Vitamin and mineral deficiency	Magnesium deficiency	Magnesium aspartate	No	Tab 615mg (2.5mmol Mg) Gran. 1.23 g/bag (5mmol Mg) 2.46 g/bag (10mmol Mg) Eff. tablet 1.844g (7.5mmol Mg) MAGNESIOCAR D	Yes	Gran. (5mmol Mg) Eff. tablet (7.5 mmol Mg) MAGNESIUM BIOMED	NA	NA	NA	Other mineral supplement	NA	NA	NA	No	No international recommendations. Small benefit of magnesium treatment on cramp frequency, intensity or duration. However, the need for magnesium is increased in athletes due to increased renal excretion and sweat losses.
Vitamin and mineral deficiency	Magnesium deficiency	Magnesium citrate	No	Gran. 1.863 g/bag (12.4 mmol Mg) MAGNESIUM DIASPORAL	No	NA	Yes	Sucking tablet 100mg (4.0 mmol Mg) MAGNESIUM DIASPORAL	NA	Other mineral supplement	NA	NA	NA	No	No international recommendations. Small benefit of magnesium treatment on cramp frequency, intensity or duration. However, the need for magnesium is increased in athletes due to increased renal excretion and sweat losses.
Vitamin and mineral deficiency	Magnesium deficiency	Magnesium pidolate	No	Oral sol. Powder 122 mg/10ml (5mmol Mg) MAG 2 184 mg/bag (7.5mmol Mg) MAG 2 strong	No	NA	No	NA	Positive	Other mineral supplement	Yes	Magnesium aspartate Gran. (5mmol Mg) Eff. tablet (7.5 mmol Mg) MAGNESIUM BIOMED Sucking tablet 100mg (4.0 mmol Mg) MAGNESIUM DIASPORAL	NA	No	No international recommendations. Small benefit of magnesium treatment on cramp frequency, intensity or duration. However, the need for magnesium is increased in athletes due to increased renal excretion and sweat losses.
Vitamin and mineral deficiency	Potassium deficiency	Potassium chloride	No	Tabs delayed 745.5 mg (10 mmol of K+ ) 600 mg (8 mmol K )+ KCL DELAY Hausmann	No	NA	No	NA	Negative	Mineral supplement: K	NA	NA	NA	Yes	Caution due to a serious risk hyperkalemia. Risk of cardiac arrest. Note: difficile diagnostic in the pharmacy.
Vitamin and mineral deficiency	Potassium deficiency	Potassium citrate/Potassium bicarbonate	No	Eff. tablet 1700mg 1440mg (30 mmol K+) POTASSIUM EFFERVETTE Hausmann	No	NA	No	NA	Negative	Mineral supplement: K	NA	NA	NA	Yes	Caution due to a serious risk hyperkalemia. Risk of cardiac arrest. Note: difficile diagnostic in the pharmacy.
Caries prophylaxis	Caries prophylaxis	Sodium fluoride local	No	Toothpaste 11 mg/g (5 mg/g fluoride) DURAPHAT	No	NA	No	NA	Positive	Stomatological preparation	Yes	Jelly 27.6 mg/g (12.5 mg/g fluoride) ELMEX	NA	No	Prevention of dental caries in cases of increased risk: fluoride 5 mg/g toothpaste should not be used for be used alone but as part of a comprehensive therapeutic or prophylactic program. If there is an increased risk of tooth decay, recommend to brush the teeth once a week with a fluoride gel (containing about 10 times more fluoride than adult toothpaste) or rinse the mouth daily with a fluoride…
Caries prophylaxis	Caries prophylaxis	Olaflur/Dectaflur local	No	Sol. 121,26 mg/g + 11.5 mg/g (10 mg/g fluoride) ELMEX fluid	No	NA	Yes	Jelly 27.6 mg/g (12.5 mg/g fluoride) ELMEX	NA	Stomatological preparation	NA	NA	NA	No	Prevention of dental caries in cases of increased risk: fluoride 5 mg/g toothpaste should not be used for be used alone but as part of a comprehensive therapeutic or prophylactic program. If there is an increased risk of tooth decay, recommend to brush the teeth once a week with a fluoride gel (containing about 10 times more fluoride than adult toothpaste) or rinse the mouth daily with a fluoride…
Difficulty falling asleep	Difficulty falling asleep	Doxylamine succinate	No	Drops 10mg/ml SANALEPSI N	No	NA	No	NA	Positive	Antihistamine	No	NA	Yes	Yes	1st drug choice: herbal medicine, despite modest effectiveness. The doxylamine is the short treatment option.
Low blood pressure	Low blood pressure	Etilefrin hydrochloride	No	Sol. 7.5mg/g EFFORTIL	No	NA	No	NA	Positive	Cardiac stimulant, excl. cardiac glycosides	No	NA	No	Yes	Small evidence on drug treatments. 1st choice: midodrine. Etilefrin: α1- and β1- adrenergic properties. Adverse effects: positive inotropic and chronotropic effect, so caution in patients with ischemic heart disease, tachycardia or cardiac arrhythmia.
Travel sickness and vertigo	Travel sickness and dizziness	Cinnarizine	No	Tab 25mg Drops 75 mg/g STUGERON	No	NA	No	NA	Positive	Antivertigo	No	NA	Yes	Yes	One of the 1st drug choices. No more effective than anti-H1 sedatives. Beware of extrapyramidal effects.
Emergency contraception	Emergency contraception	Levonorgestrel	No	Tab 1,5mg POSTINOR	No	NA	No	NA	Positive	Hormonal contraceptive for systemic use	No	NA	Yes	Yes	1st choice: oral levonorgestrel, single dose.
Opioid overdose	Opioid overdose	Naloxone	No	Spray 1,8mg NYXOID	No	NA	No	NA	Positive	Peripheral opioid receptor antagonist	No	NA	Yes	Yes	Support for an overdose: naloxone + emergency medical services.
Smoking cessation	Smoking cessation	Varenicline	No	Tab 0.5 mg or 1mg CHAMPIX	No	NA	No	NA	Positive	Drug use in addictive disorders	No	NA	No	No	1st choice in drug treatment for smoking cessation: nicotine substitutes. Varenicline: an option in failure with nicotine.
